# Supplementary material
Source: PubMed Central journal article supplement (PMC3435556)
Supplement: supp_D028803_jlr.D028803-1.pdf [file supp_D028803_jlr.D028803-1.pdf]

## Supplementary Material

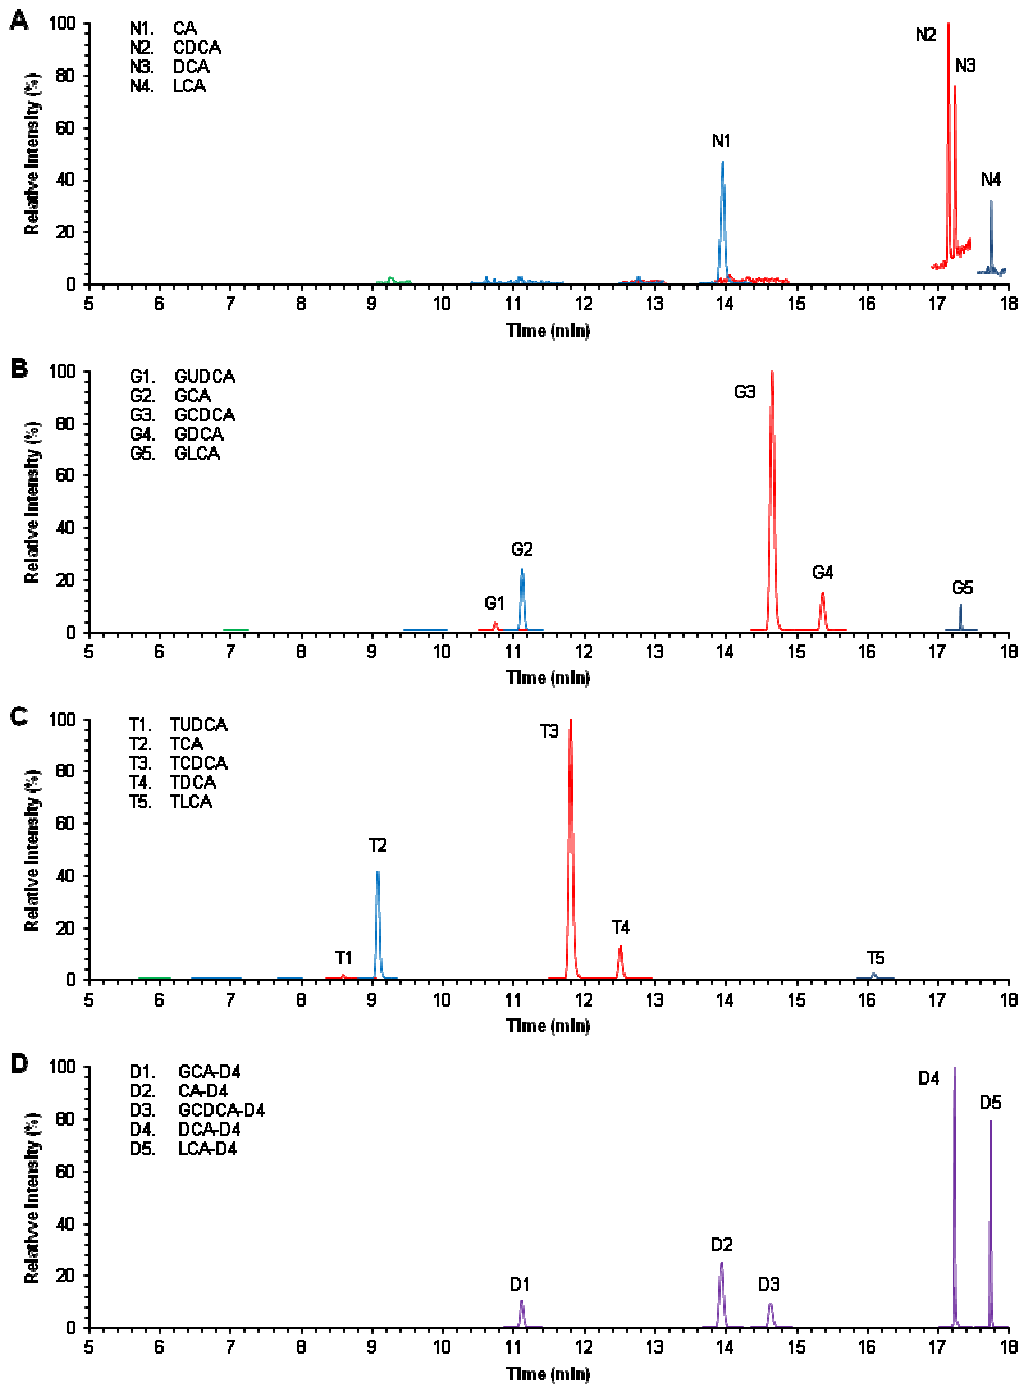

**Fig. S1.** Chromatographic separation of a pooled human liver sample. A: Non conjugated BAs. B: Glycine-conjugated BAs. C: Taurine-conjugated BAs. D: Deuterium-labeled internal standards. All the BAs were separated and detected in a single analytical run. *Green*: DHCA; *blue*: tri-hydroxylated BAs; *red*: di-hydroxylated BAs; *dark-blue*: mono-hydroxylated BAs.

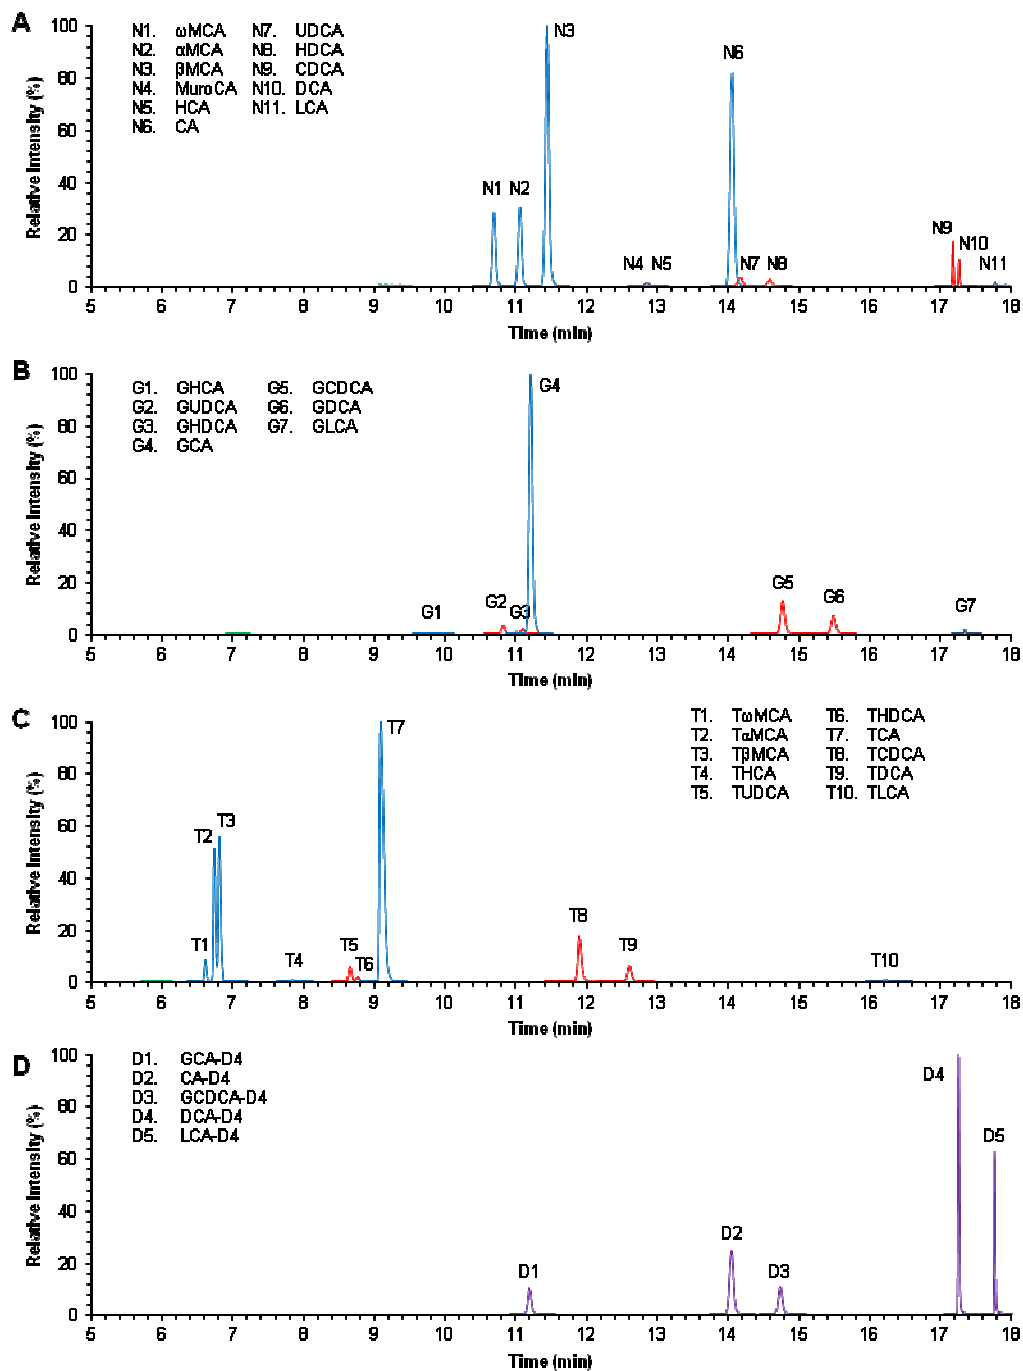

**Fig. S2.** Chromatographic separation of a pooled rat liver sample. A: Non conjugated BAs. B: Glycine-conjugated BAs. C: Taurine-conjugated BAs. D: Deuterium-labeled internal standards. All the BAs were separated and detected in a single analytical run. *Green*: DHCA; *blue*: tri-hydroxylated BAs; *red*: di-hydroxylated BAs; *dark blue*: mono-hydroxylated BAs.

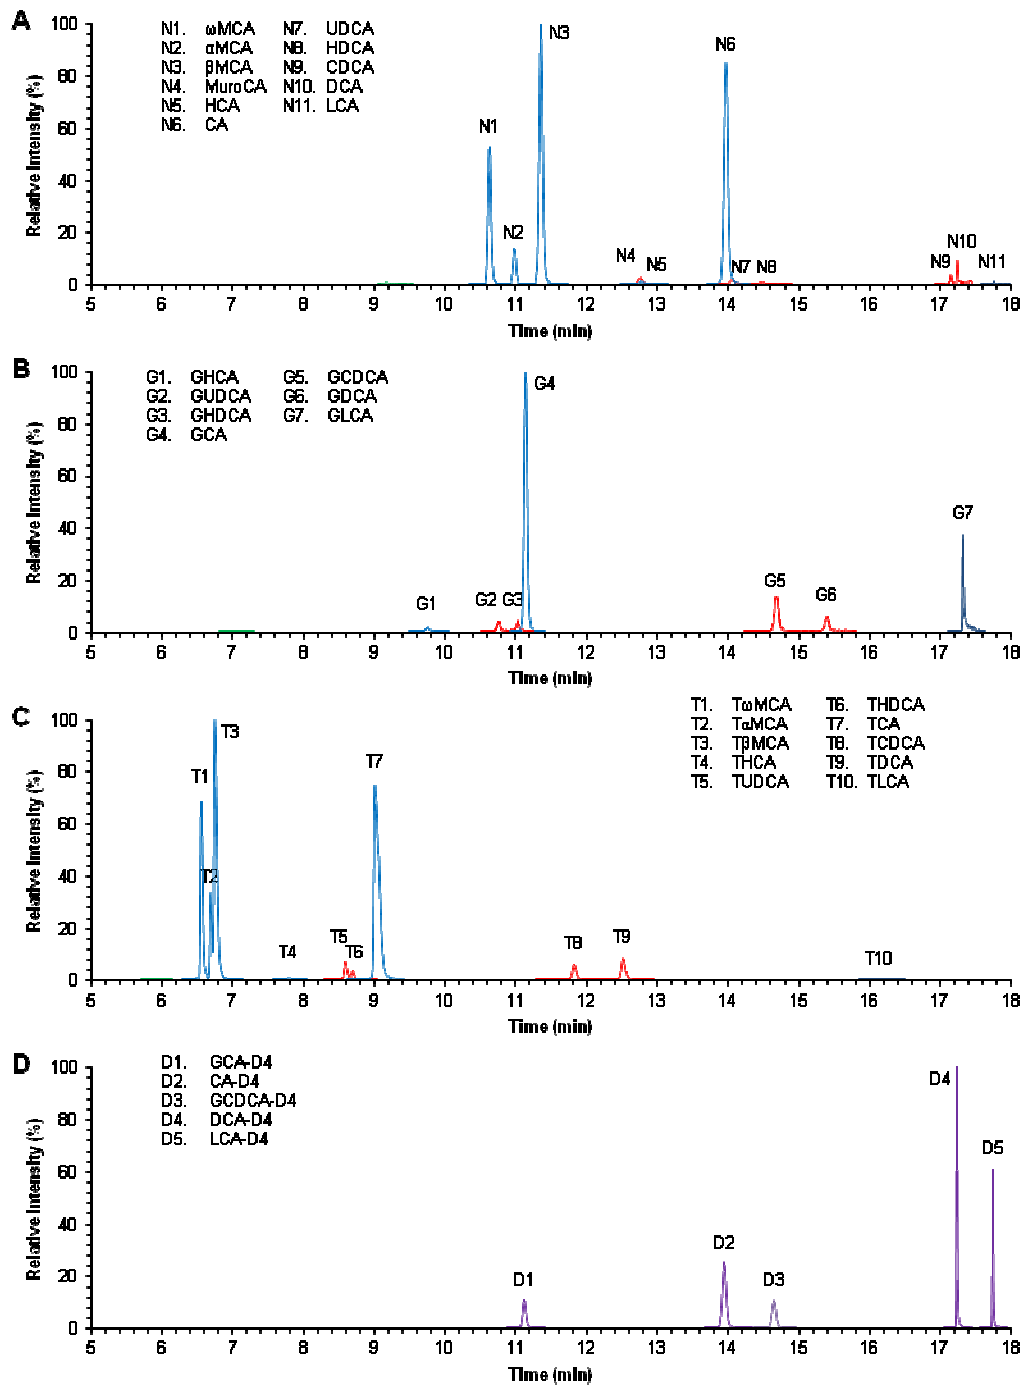

**Fig. S3.** Chromatographic separation of a pooled mouse liver sample. A: Non conjugated BAs. B: Glycine-conjugated BAs. C: Taurine-conjugated BAs. D: Deuterium-labeled internal standards. All the BAs were separated and detected in a single analytical run. *Green*: DHCA; *blue*: tri-hydroxylated BAs; *red*: di-hydroxylated BAs; *dark blue*: mono-hydroxylated BAs.

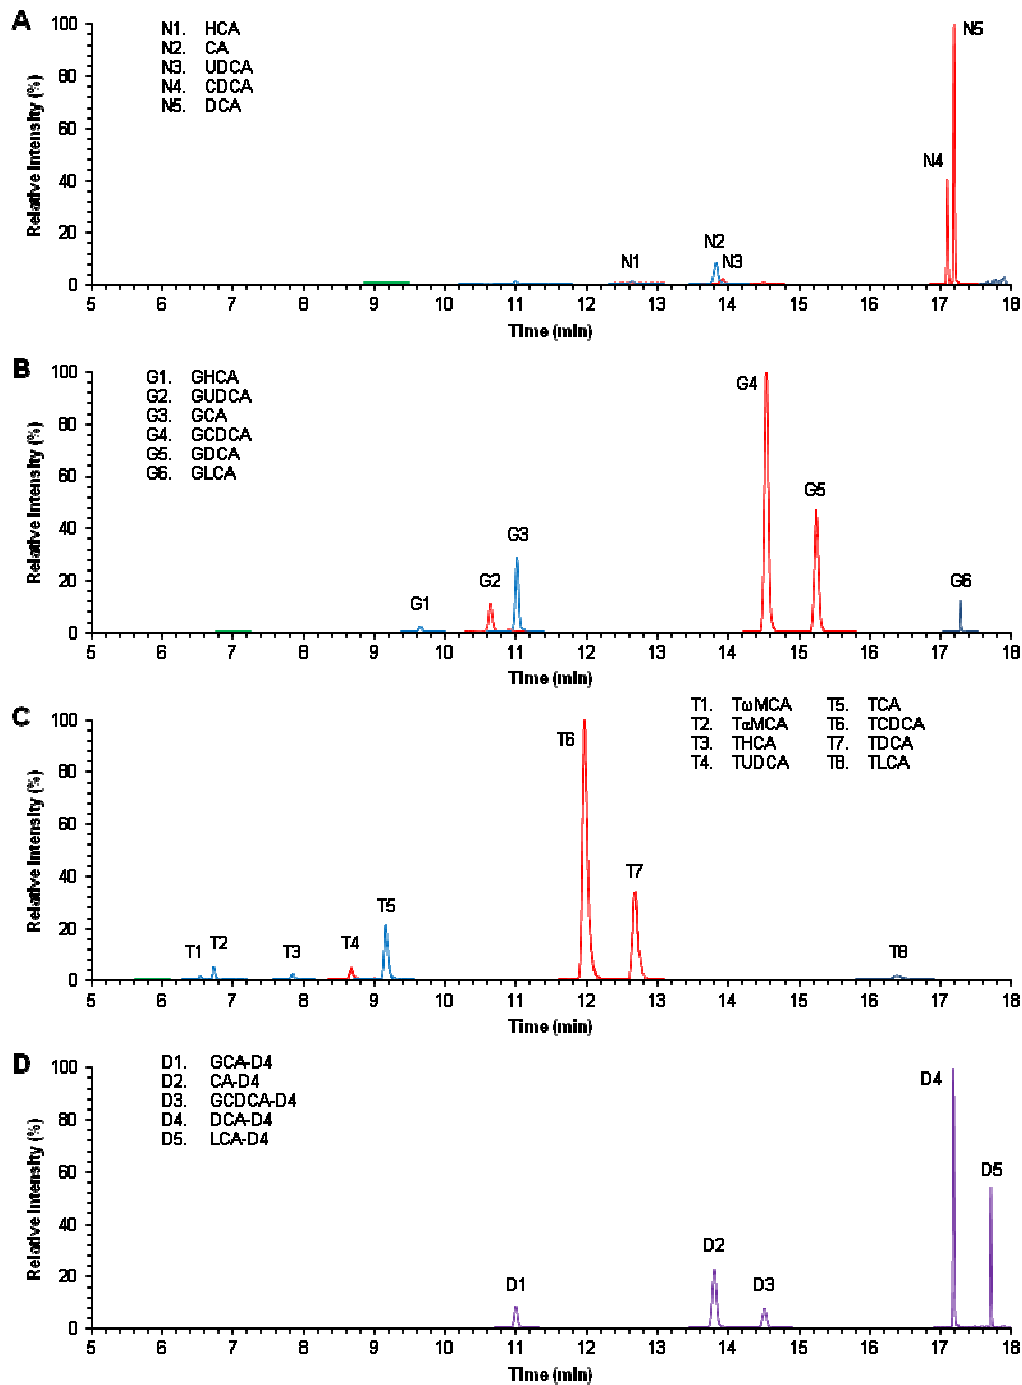

**Fig. S4.** Chromatographic separation of a pooled human serum sample. A: Non conjugated BAs. B: Glycine-conjugated BAs. C: Taurine-conjugated BAs. D: Deuterium-labeled internal standards. All the BAs were separated and detected in a single analytical run. *Green*: DHCA; *blue*: tri-hydroxylated BAs; *red*: di-hydroxylated BAs; *dark blue*: mono-hydroxylated BAs.

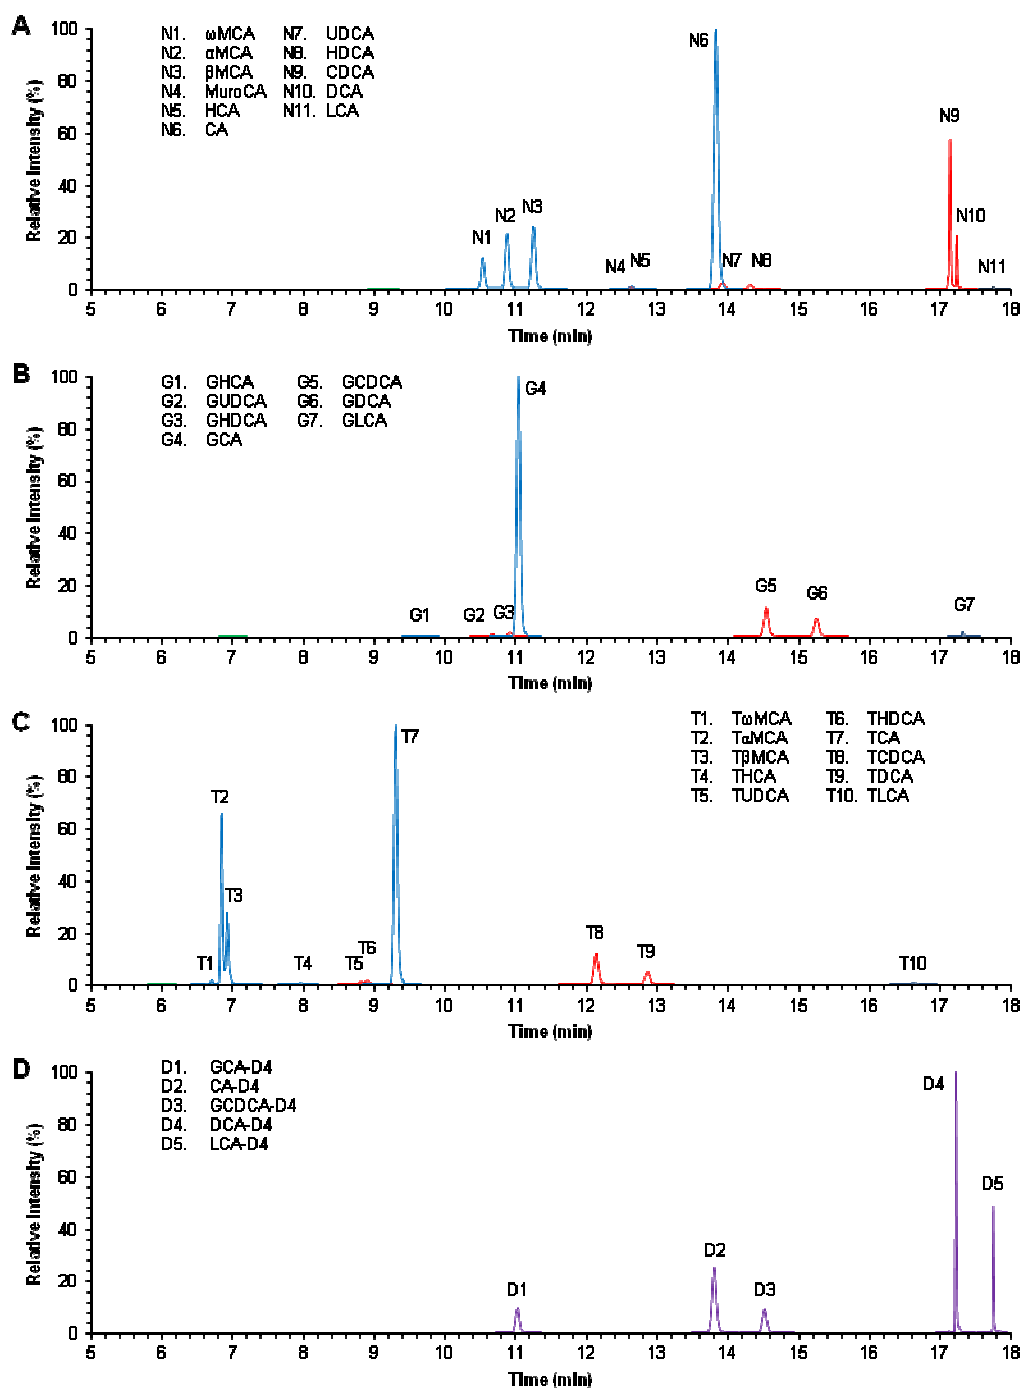

**Fig. S5.** Chromatographic separation of a pooled rat serum sample. A: Non conjugated BAs. B: Glycine-conjugated BAs. C: Taurine-conjugated BAs. D: Deuterium-labeled internal standards. All the BAs were separated and detected in a single analytical run. *Green*: DHCA; *blue*: tri-hydroxylated BAs; *red*: di-hydroxylated BAs; *dark blue*: mono-hydroxylated BAs.

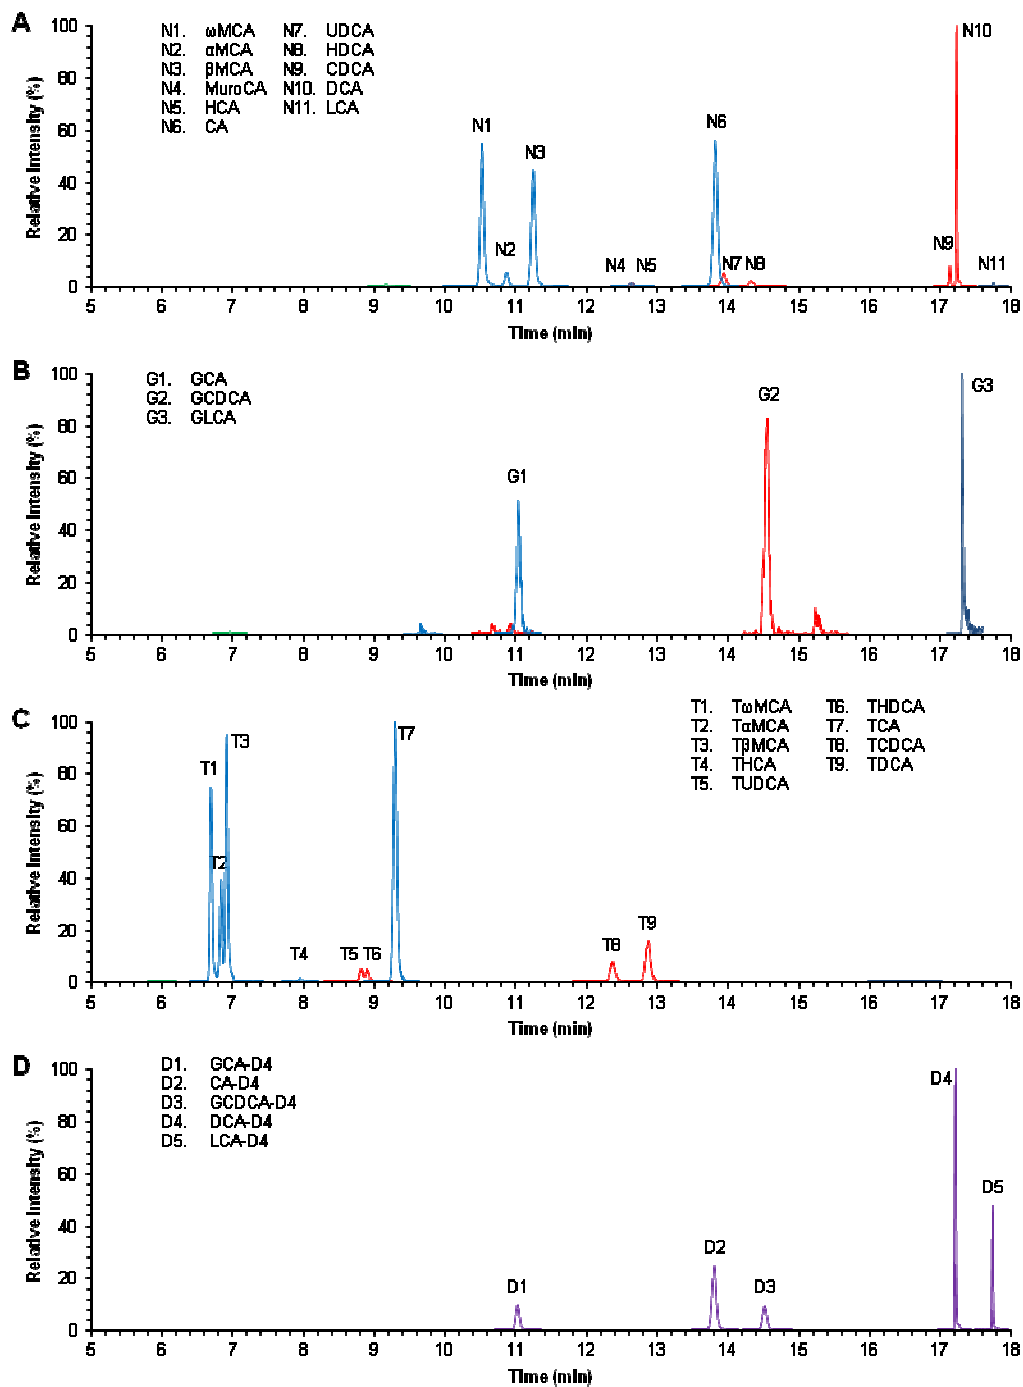

**Fig. S6.** Chromatographic separation of a pooled mouse serum sample. A: Non conjugated BAs. B: Glycine-conjugated BAs. C: Taurine-conjugated BAs. D: Deuterium-labeled internal standards. All the BAs were separated and detected in a single analytical run. *Green*: DHCA; *blue*: tri-hydroxylated BAs; *red*: di-hydroxylated BAs; *dark blue*: mono-hydroxylated BAs.

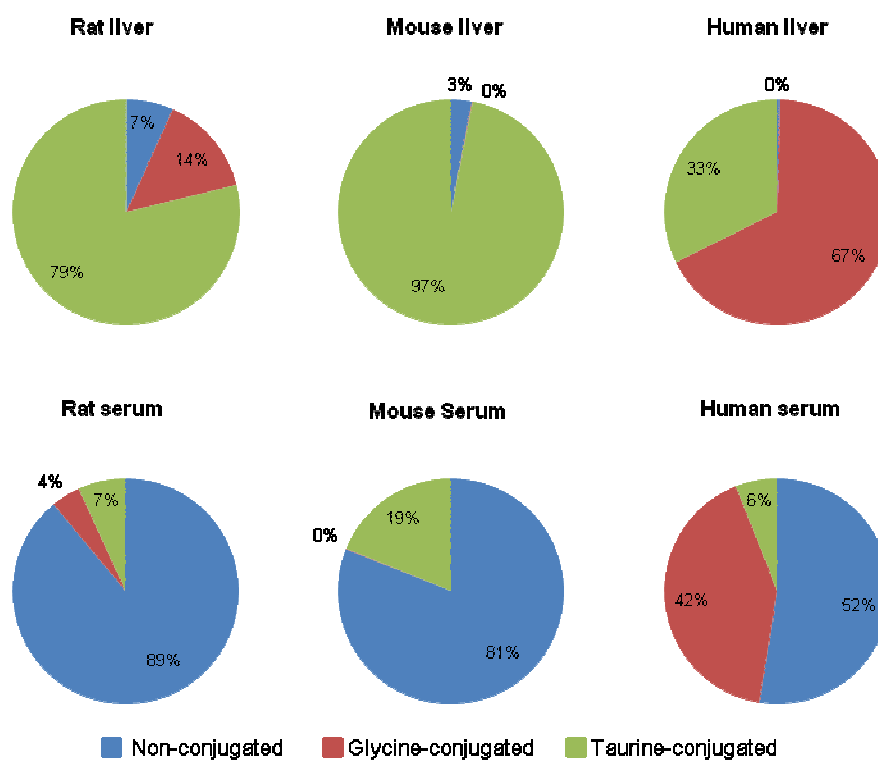

**Fig. S7.** Percentage of non conjugated (blue), glycine-conjugated (red) and taurine-conjugated (green) bile acids in rat, mouse and human serum and in liver tissue. The results are expressed as a percentage of the total amount of BAs.

## Supplemental Material

TABLE S1. Validation of the serum bile acid extraction protocol

| Bile Acid          | Sample 1 | Sample 2 | Sample 3 | Sample 4 | Sample 5 | Sample 6 | Mean   | CV<br>(Injection) | CV<br>(Preparation) |
|--------------------|----------|----------|----------|----------|----------|----------|--------|-------------------|---------------------|
| CDCA               | 238.6    | 237.8    | 238.6    | 242.6    | 239.5    | 233.5    | 238.4  | 2.3               | 1.2                 |
| DCA                | 297.2    | 295.2    | 296.3    | 299.9    | 297.6    | 293.2    | 296.5  | 3.0               | 0.8                 |
| UDCA               | 19.6     | 19.6     | 19.0     | 20.4     | 19.9     | 19.8     | 19.7   | 3.4               | 2.4                 |
| CA                 | 133.6    | 128.7    | 127.2    | 135.0    | 135.2    | 134.7    | 132.4  | 1.8               | 2.7                 |
| HCA                | 6.9      | 7.7      | 7.6      | 7.7      | 7.2      | 7.4      | 7.4    | 6.8               | 4.1                 |
| GLCA               | 41.7     | 39.6     | 46.4     | 44.4     | 37.8     | 38.8     | 41.4   | 11.6              | 8.1                 |
| GCDCA              | 1210.5   | 1206.4   | 1195.1   | 1197.7   | 1219.4   | 1196.1   | 1204.2 | 1.1               | 0.8                 |
| GDCA               | 507.2    | 492.9    | 484.9    | 490.6    | 495.4    | 478.4    | 491.6  | 2.0               | 2.0                 |
| GUDCA              | 94.7     | 94.6     | 92.5     | 93.1     | 95.2     | 92.4     | 93.8   | 2.2               | 1.3                 |
| GCA                | 268.7    | 271.5    | 260.8    | 262.4    | 269.0    | 262.0    | 265.7  | 1.8               | 1.7                 |
| GHCA               | 19.5     | 18.9     | 18.9     | 19.0     | 19.3     | 18.8     | 19.1   | 2.5               | 1.5                 |
| TCDCa              | 148.2    | 149.7    | 143.7    | 145.9    | 147.2    | 143.6    | 146.4  | 1.6               | 1.7                 |
| TDCA               | 43.7     | 43.5     | 43.4     | 44.5     | 43.7     | 42.8     | 43.6   | 2.6               | 1.2                 |
| TCA                | 30.8     | 30.4     | 30.6     | 30.6     | 30.6     | 29.5     | 30.4   | 3.7               | 1.5                 |
| Non conjugated     | 696.0    | 689.0    | 688.6    | 705.6    | 699.3    | 688.6    | 694.5  | 2.3               | 1.0                 |
| Glycine-conjugated | 2142.3   | 2124.0   | 2098.6   | 2107.3   | 2136.1   | 2086.5   | 2115.8 | 0.9               | 1.0                 |
| Taurine-conjugated | 222.7    | 223.7    | 217.7    | 220.9    | 221.6    | 215.9    | 220.4  | 1.5               | 1.4                 |
| Total              | 3060.9   | 3036.7   | 3004.8   | 3033.8   | 3057.0   | 2991.1   | 3030.7 | 0.9               | 0.9                 |

BAs concentrations are expressed in nM as the mean value of four replicates. CV: coefficient of variation expressed as a percentage (%). Injection variability is expressed as the mean of the CV obtained for each sample injection replicate. Preparation variability is expressed as the CV obtained for the concentration mean values of each sample.



TABLE S2. Validation of the liver bile acid extraction protocol

| Bile Acid          | Sample 1 | Sample 2 | Sample 3 | Sample 4 | Sample 5 | Sample 6 | Sample 7 | Mean (1-6) | CV (1-6) | Accuracy |
|--------------------|----------|----------|----------|----------|----------|----------|----------|------------|----------|----------|
| LCA                | 29.0     | 19.8     | 39.7     | 63.5     | 29.4     | 36.8     | 20.4     | 36.4       | 41.2     | -44.0    |
| MuroCA             | 114.2    | 93.7     | 111.1    | 102.9    | 155.3    | 136.0    | 130.4    | 118.9      | 19.2     | 9.7      |
| CDCA               | 275.2    | 167.5    | 169.2    | 141.2    | 324.0    | 237.4    | 234.5    | 219.1      | 32.7     | 7.0      |
| DCA                | 83.2     | 56.7     | 69.1     | 125.3    | 94.6     | 96.5     | 73.3     | 87.6       | 27.3     | -16.3    |
| UDCA               | 105.2    | 82.0     | 89.6     | 90.2     | 139.7    | 111.5    | 114.8    | 103.0      | 20.4     | 11.5     |
| HDCA               | 275.4    | 240.3    | 275.7    | 310.3    | 361.0    | 334.0    | 272.3    | 299.4      | 14.7     | -9.1     |
| CA                 | 5587.1   | 3435.4   | 4604.4   | 2547.7   | 7070.4   | 6123.6   | 4697.8   | 4894.7     | 34.7     | -4.0     |
| $\omega$ MCA       | 1859.4   | 1586.0   | 1765.5   | 2022.7   | 2353.0   | 2154.1   | 1957.8   | 1956.8     | 14.2     | 0.1      |
| $\alpha$ MCA       | 2360.6   | 1701.8   | 2215.0   | 1551.3   | 3299.4   | 2897.1   | 2286.9   | 2337.5     | 28.9     | -2.2     |
| $\beta$ MCA        | 4834.5   | 3952.2   | 4797.2   | 4424.9   | 6686.6   | 5943.6   | 5158.8   | 5106.5     | 19.9     | 1.0      |
| HCA                | 24.9     | 18.7     | 22.9     | 22.3     | 32.2     | 29.5     | 25.0     | 25.1       | 19.8     | -0.4     |
| GLCA               | 122.6    | 90.1     | 184.6    | 139.0    | 168.7    | 165.0    | 85.6     | 145.0      | 24.1     | -41.0    |
| GCDCA              | 2463.5   | 2048.4   | 2069.6   | 1809.5   | 2423.5   | 2309.5   | 2671.3   | 2187.4     | 11.6     | 22.1     |
| GDCA               | 1439.9   | 1177.7   | 1388.8   | 1279.6   | 1548.5   | 1644.1   | 1441.6   | 1413.1     | 12.1     | 2.0      |
| GUDCA              | 401.0    | 332.1    | 374.9    | 316.2    | 474.5    | 433.5    | 477.5    | 388.7      | 15.5     | 22.8     |
| GHDCa              | 225.4    | 205.6    | 214.5    | 214.2    | 266.9    | 234.7    | 284.4    | 226.9      | 9.7      | 25.3     |
| GCA                | 20502.6  | 15708.7  | 18168.7  | 15663.4  | 24057.0  | 23658.6  | 22477.9  | 19626.5    | 19.0     | 14.5     |
| TLCA               | 525.6    | 614.8    | 609.6    | 938.4    | 958.3    | 1000.6   | 381.8    | 774.6      | 27.5     | -50.7    |
| TCDCa              | 6526.4   | 6165.4   | 6540.3   | 6180.7   | 6619.7   | 6362.9   | 7123.5   | 6399.2     | 3.0      | 11.3     |
| TDCA               | 2376.6   | 2199.0   | 2682.0   | 3076.3   | 2597.1   | 3072.1   | 2382.3   | 2667.2     | 13.4     | -10.7    |
| TUDCA              | 1418.7   | 1301.7   | 1552.3   | 1466.3   | 1734.5   | 1637.2   | 1709.2   | 1518.4     | 10.3     | 12.6     |
| THDCa              | 975.1    | 959.1    | 1041.3   | 1159.1   | 1222.7   | 1152.6   | 1222.7   | 1085.0     | 10.0     | 12.7     |
| TCA                | 48649.5  | 41144.2  | 48989.4  | 45990.1  | 57916.0  | 57734.1  | 49317.9  | 50070.6    | 13.2     | -1.5     |
| T $\omega$ MCA     | 4914.4   | 4555.9   | 5099.2   | 6067.2   | 5743.4   | 5371.0   | 6007.3   | 5291.9     | 10.5     | 13.5     |
| T $\alpha$ MCA     | 18684.8  | 16231.0  | 19370.8  | 18691.8  | 22566.8  | 22030.4  | 20453.9  | 19595.9    | 12.0     | 4.4      |
| T $\beta$ MCA      | 12539.0  | 11399.2  | 13321.1  | 13694.6  | 15806.0  | 14747.6  | 14730.1  | 13584.6    | 11.5     | 8.4      |
| THCA               | 206.7    | 189.0    | 205.4    | 221.8    | 226.8    | 214.6    | 196.8    | 210.7      | 6.4      | -6.6     |
| Non conjugated     | 15548.7  | 11354.1  | 14159.3  | 11402.3  | 20545.6  | 18100.1  | 14972.1  | 15185.0    | 24.2     | -1.4     |
| Glycine-conjugated | 25155.0  | 19562.6  | 22401.1  | 19422.0  | 28939.2  | 28445.4  | 27438.3  | 23987.6    | 17.6     | 14.4     |
| Taurine-conjugated | 96816.7  | 84759.3  | 99411.2  | 97486.4  | 115391.4 | 113323.2 | 103525.5 | 101198.1   | 11.3     | 2.3      |
| Total              | 137520.5 | 115676.0 | 135971.6 | 128310.7 | 164876.2 | 159868.7 | 145935.9 | 140370.6   | 13.4     | 4.0      |

Bile acids concentrations are expressed in fmol/mg of tissue. CV: coefficient of variation expressed as a percentage (%). Mean and CV were obtained using those values obtained for Samples 1 to 6. Accuracy is expressed as a percentage and is calculated using the following formula: Accuracy (%) = 100 x [Sample 7 concentration – mean (1-6) concentration]/ mean (1-6) concentration. Only those bile acids with values above the lower limit of quantification are shown.

TABLE S3. Accuracy in biological matrices

| Bile Acid | Blank matrix |       |       | Rat Liver |       |       | Rat Serum |       |      | Mouse Liver |       |       | Mouse Serum |       |       | Human Liver |       |       | Human Serum |       |      |
|-----------|--------------|-------|-------|-----------|-------|-------|-----------|-------|------|-------------|-------|-------|-------------|-------|-------|-------------|-------|-------|-------------|-------|------|
|           | L            | M     | H     | L         | M     | H     | L         | M     | H    | L           | M     | H     | L           | M     | H     | L           | M     | H     | L           | M     | H    |
| LCA       | -18.6        | -7.6  | -4.0  | 13.3      | 12.4  | 4.9   | 29.0      | 13.6  | 3.7  | 13.1        | 5.7   | 2.3   | 16.3        | 6.8   | 2.2   | 18.2        | 8.5   | 2.4   | 21.1        | 11.2  | 4.3  |
| MuroCA    | -2.2         | -19.1 | -7.3  | -2.7      | -2.6  | 3.3   | 4.3       | -6.4  | 4.9  | -0.4        | -4.1  | 2.0   | -4.6        | -7.8  | 3.1   | -0.3        | -7.8  | 3.1   | -3.0        | -10.7 | 2.9  |
| CDCA      | 12.3         | -18.5 | -9.9  | 1.2       | -3.2  | -1.7  | 11.9      | -2.4  | -1.8 | 2.5         | -3.2  | -4.5  | 0.9         | -3.7  | -2.8  | 2.8         | -2.8  | -2.7  | 16.0        | -4.3  | -2.0 |
| DCA       | -9.5         | -15.0 | -11.4 | 9.0       | 4.6   | 0.8   | 20.4      | 6.3   | 0.4  | 10.5        | 4.0   | -1.4  | 7.1         | 3.3   | -0.1  | 8.1         | 4.2   | 0.0   | 19.9        | 3.6   | 0.3  |
| UDCA      | 7.0          | -11.4 | -0.8  | -5.7      | -1.7  | 1.7   | 4.5       | -7.3  | 2.5  | -1.2        | -2.7  | -0.4  | -1.7        | -6.9  | 1.7   | -0.2        | -6.8  | 1.7   | -0.1        | -10.4 | 1.2  |
| HDCA      | 15.9         | -11.4 | -3.2  | -11.0     | -9.1  | -1.7  | -0.1      | -11.9 | -0.9 | -11.2       | -11.9 | -3.8  | -12.1       | -13.0 | -2.0  | -10.1       | -13.0 | -2.0  | 3.4         | -14.4 | -1.3 |
| DHCA      | -9.7         | -9.4  | -3.7  | -2.6      | 0.7   | 4.0   | -6.5      | 5.7   | 2.7  | -3.6        | 9.1   | 1.4   | -1.5        | 7.0   | 4.7   | -9.6        | 7.0   | 4.7   | -5.1        | 4.0   | 1.7  |
| CA        | -16.8        | -7.5  | -5.4  | 10.4      | 7.7   | 1.6   | 13.5      | 6.1   | 0.3  | 11.8        | 6.6   | -0.7  | 13.0        | 7.1   | 0.9   | 11.4        | 7.3   | 1.0   | 17.4        | 7.3   | -0.7 |
| ωMCA      | -17.9        | -5.0  | -4.6  | 2.1       | 6.8   | 4.6   | 9.5       | 5.2   | 1.4  | 3.3         | 5.8   | 0.5   | 1.7         | 5.4   | 2.3   | 4.9         | 5.4   | 2.3   | -1.4        | 3.4   | 0.7  |
| αMCA      | -10.4        | -3.8  | -1.9  | 2.6       | 7.0   | 5.3   | 12.2      | 5.7   | 1.4  | 2.6         | 6.2   | 1.0   | -1.0        | 5.7   | 3.0   | 3.4         | 5.7   | 3.0   | 13.3        | 4.9   | 1.1  |
| βMCA      | -19.1        | -6.6  | -5.6  | 4.9       | 4.1   | 4.9   | 10.9      | 4.4   | 3.6  | 3.5         | 3.4   | 1.8   | 1.2         | 6.3   | 3.9   | 3.2         | 6.4   | 3.9   | 9.3         | 2.5   | 2.5  |
| HCA       | -12.5        | -7.6  | -5.8  | 8.7       | 6.6   | 6.8   | 16.1      | 7.4   | 5.1  | 4.4         | 6.5   | 3.6   | 5.2         | 5.5   | 5.1   | 6.2         | 5.5   | 5.1   | 4.7         | 7.3   | 2.9  |
| GLCA      | -16.6        | 7.1   | 20.9  | -14.9     | -11.1 | -10.2 | -12.7     | -10.4 | -4.4 | -16.1       | -13.2 | -10.3 | -11.6       | -7.6  | -6.7  | -17.2       | -13.2 | -10.3 | 10.9        | 6.9   | 5.0  |
| GCDCA     | -5.8         | -10.5 | -7.1  | 8.3       | 3.2   | -1.5  | 17.6      | 3.7   | -1.2 | 7.7         | 3.2   | -3.1  | 8.5         | 3.8   | -2.6  | 7.0         | 4.1   | -2.5  | 13.6        | 2.7   | -0.7 |
| GDCA      | -11.5        | -0.9  | -6.2  | 8.2       | 3.6   | -3.3  | 17.6      | 7.0   | -3.5 | 10.0        | 5.0   | -6.3  | 10.1        | 0.5   | -5.2  | 6.6         | 0.5   | -5.2  | 19.2        | 1.6   | -4.0 |
| GUDCA     | -3.0         | -8.0  | -5.9  | 0.3       | -0.3  | -4.9  | 3.3       | -4.0  | -7.4 | -2.5        | 1.3   | -8.4  | -2.2        | -1.8  | -6.9  | -0.9        | -1.8  | -6.9  | -3.5        | -5.6  | -8.1 |
| GHDCA     | -2.6         | -8.0  | -5.7  | 1.8       | 3.6   | -1.8  | 9.8       | 1.2   | -3.1 | 1.1         | 2.6   | -4.8  | -0.6        | 2.1   | -3.6  | 1.4         | 2.1   | -3.6  | 1.3         | -1.3  | -3.6 |
| GDHCA     | -10.1        | -4.9  | -3.6  | -1.9      | 1.3   | -4.8  | -2.7      | -0.8  | -7.7 | -9.4        | 2.6   | -5.6  | -11.9       | 0.3   | -5.9  | -8.5        | 0.3   | -5.9  | -7.5        | -1.3  | -6.2 |
| GCA       | -4.0         | -8.9  | -6.4  | 5.6       | 3.3   | -1.4  | 12.4      | 1.4   | -3.8 | 1.1         | 3.5   | -2.4  | 4.2         | 1.8   | -2.7  | 5.7         | 1.9   | -2.7  | 11.8        | 1.0   | -2.6 |
| GHCA      | -14.6        | -2.1  | -8.2  | 10.8      | 7.8   | -1.5  | 12.1      | 6.2   | -2.3 | 0.8         | 5.9   | -2.2  | 0.3         | 6.5   | -4.7  | 2.2         | 6.5   | -4.7  | 3.2         | 6.8   | -1.4 |
| TLCA      | 7.6          | 12.0  | 17.3  | 23.4      | 1.9   | -0.5  | 15.3      | 2.3   | 5.3  | 10.1        | -4.5  | -9.7  | -7.3        | -6.1  | -1.3  | 16.0        | 9.1   | -9.8  | -1.2        | 0.7   | 7.0  |
| TCDCa     | -7.9         | -6.3  | -9.1  | 17.8      | 3.8   | -2.7  | 15.5      | 5.9   | 2.6  | 19.3        | 3.9   | -4.8  | 18.3        | 2.0   | -3.6  | 9.8         | 2.0   | -3.6  | 17.5        | 4.4   | -2.3 |
| TDCA      | -5.9         | -5.5  | -4.1  | 10.2      | 5.4   | 1.5   | 18.2      | 7.3   | 6.7  | 10.7        | 4.4   | -0.3  | 15.1        | 5.1   | 0.2   | 8.0         | 5.3   | 0.3   | 19.6        | 7.9   | 3.5  |
| TUDCA     | -1.7         | -11.0 | -10.3 | 1.8       | 2.6   | -6.0  | 12.8      | 2.2   | -3.9 | 2.4         | 3.4   | -7.6  | 3.5         | 0.5   | -7.9  | 3.1         | 0.5   | -7.9  | -0.4        | -1.3  | -7.5 |
| THDCA     | -2.7         | -15.8 | -12.1 | -1.6      | -9.5  | -14.5 | 14.8      | -3.3  | -7.9 | 9.4         | -2.4  | -8.5  | 11.0        | -5.4  | -10.5 | 12.6        | -5.4  | -10.5 | 14.2        | -5.3  | -7.6 |
| TDHCA     | -7.8         | -5.0  | -7.3  | -5.4      | 5.8   | -4.5  | 1.0       | 3.8   | -4.0 | -10.0       | 8.0   | -2.3  | -7.3        | 4.2   | -4.0  | -7.0        | 4.2   | -4.0  | -6.2        | 3.2   | -3.6 |
| TCA       | -2.7         | -10.4 | -8.0  | 8.4       | 5.2   | 1.6   | 17.1      | 7.6   | 3.9  | 7.2         | 6.3   | 1.8   | 11.5        | 3.5   | 0.6   | 6.9         | 3.5   | 0.7   | 13.6        | 5.1   | 2.1  |
| TωMCA     | -7.8         | -6.2  | -10.5 | 6.7       | 8.0   | -3.2  | 17.0      | 9.1   | 0.2  | 7.9         | 9.1   | -1.1  | 8.2         | 8.0   | -2.9  | 1.8         | 8.0   | -2.9  | 7.5         | 8.9   | -1.4 |
| TαMCA     | -7.8         | -4.3  | -9.3  | 8.9       | 5.1   | -3.1  | 20.4      | 5.9   | 0.4  | 6.7         | 6.5   | -1.0  | 14.0        | 3.7   | -3.7  | 15.9        | 3.7   | -3.7  | 12.0        | 3.9   | -1.5 |
| TβMCA     | -13.0        | -5.9  | -8.5  | 12.2      | 0.4   | -2.7  | 20.8      | 10.1  | -2.8 | 9.8         | 0.5   | 4.4   | 13.1        | 8.5   | 0.9   | 7.4         | 8.5   | 0.9   | 15.6        | 5.8   | 3.5  |
| THCA      | -2.7         | -11.0 | -11.5 | 14.2      | 2.8   | -0.2  | 17.8      | 4.7   | 3.5  | 13.0        | 2.1   | 1.1   | 14.3        | 2.9   | -0.7  | 10.7        | 2.9   | -0.7  | 14.4        | 2.5   | 0.9  |

Accuracy is expressed as the relative measurement error (RME) and is calculated using the following formula:  $RME (\%) = 100 \times (\text{calculated concentration} - \text{nominal concentration}) / \text{nominal concentration}$ . L: low concentration (40nM. each BA); M: medium concentration (312nM. each BA); H: high concentration (2500nM. each BA)
